# Supplementary material
Source: bioRxiv or medRxiv preprint supplement (https://www.biorxiv.org/highwire/filestream/125375/field_highwire_adjunct_files/3/414607-3.pdf)
Supplement: Supplementary file [file 414607-3.pdf]

Figure S3

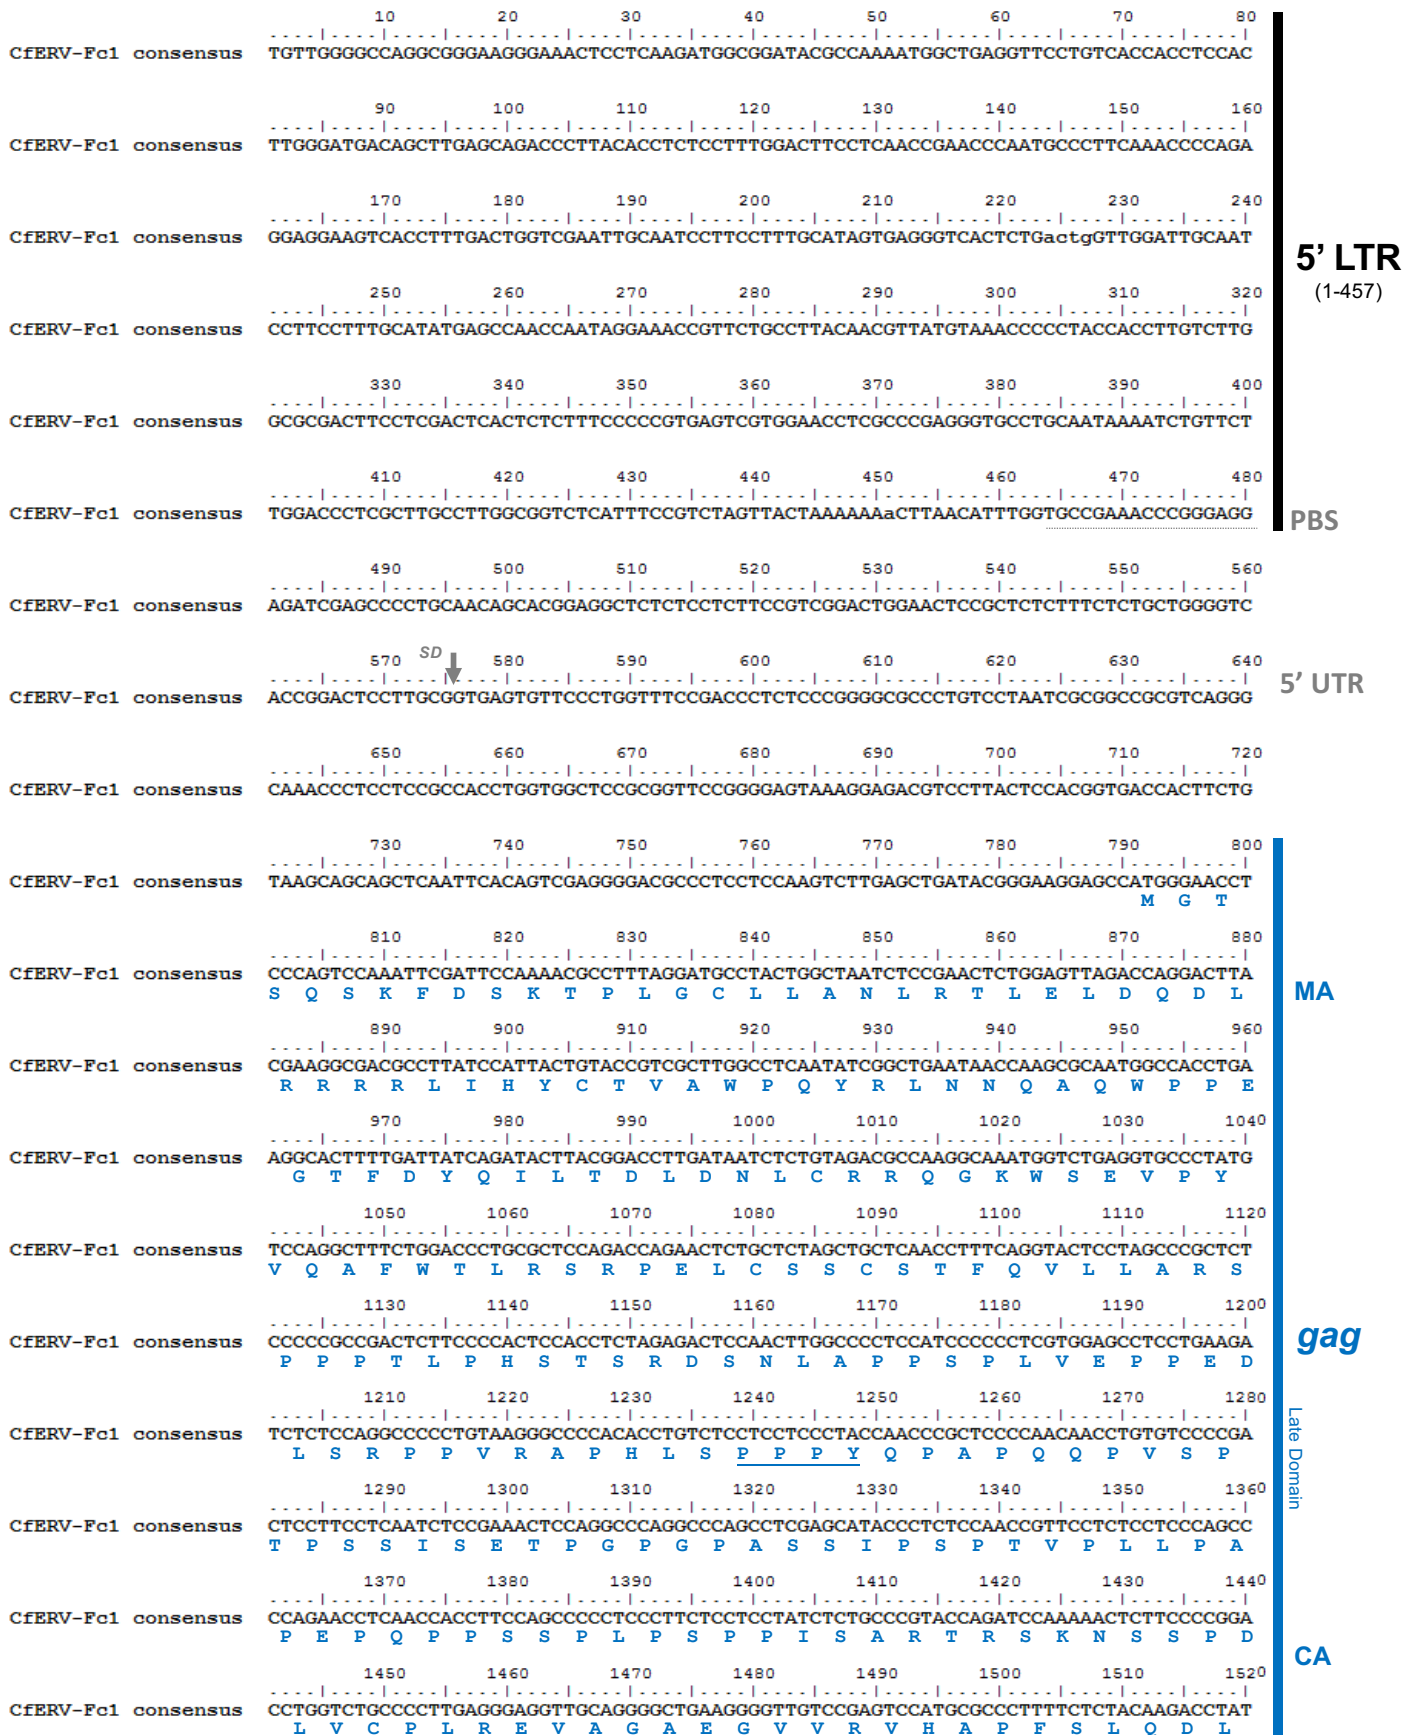

1530 1540 1550 1560 1570 1580 1590 1600  
**CfERV-Fc1 consensus** CCCAAATAGAAAAACGCTTAGGTTCCCTTTTCGGCCAATCCCGACAACACATCAAGGAATTCCAATACTTGGCGCAGGCC  
S Q I E K R L G S F S A N P D N Y I K E F Q Y L A Q A

1610 1620 1630 1640 1650 1660 1670 1680  
**CfERV-Fc1 consensus** TATGACCTAACCTGGCATGACTTACATGTATCCAGACCACCACCCTCACCCTGAGGAGAGGGAAACGTATCCAGGCTGC  
Y D L T W H K L H V I Q T T T L T T E E R E R I Q A A

1690 1700 1710 1720 1730 1740 1750 1760  
**CfERV-Fc1 consensus** TGCCCGGGGACACGCTGATCAGGTCACCTTACCAGCCACAATGGCGGTGGTCTCAGGCGGTCCCGCCGTAGAGC  
A R G H A D Q V H L T D A T M A V G A Q A V P A V E

1770 1780 1790 1800 1810 1820 1830 1840  
**CfERV-Fc1 consensus** CAGGCTGGGATTACCAAGACGGTCAAGATGGCCGCGCGCCGACCACATGGTCCGATGTCTCATCGGTGGCATGGCG  
P G W D Y Q D G Q D G R R R R D H M V R C L I A G M R

1850 1860 1870 1880 1890 1900 1910 1920  
**CfERV-Fc1 consensus** GCGCCTTAATAAGGCGTAAATATGACAAGATCAGAGAAATCATACAGGCCCTGACGAAAACCCGGCTATATTCTT  
A A S N K A V N Y D K I R E I I Q A P D E N P A I F L

1930 1940 1950 1960 1970 1980 1990 2000  
**CfERV-Fc1 consensus** TAACCGGCTGACCGAGGCATTAATTCAGTACACTCGCTTGGACCCGGCCTGTCCCGGGGGCCACGGTTCAGCCACAC  
N R L T E A L I Q Y T R L D P A C P A G A T V L A T

2010 2020 2030 2040 2050 2060 2070 2080  
**CfERV-Fc1 consensus** ATTTTATCTCTCAGTCAGCCCAGATATCCGCAAAAAATTAAGAAAAGTCGAGGAAGGCCCTCAGACCCCATTTCTGCAC  
H F I S Q S A P D I R K K L K K V E E G P Q T P I S D

2090 2100 2110 2120 2130 2140 2150 2160  
**CfERV-Fc1 consensus** CTAGTGAGAATGGCATTAAAGTCTTAACTCCCGTAGGGAAGCCGACAGGCTGAAGCGACAGGCCAGACTCCAGCAGAA  
L V R M A F K V F N S R E E A A E L K R Q A R L Q Q K

2170 2180 2190 2200 2210 2220 2230 2240  
**CfERV-Fc1 consensus** GGTTTCAGCTACAAACCCAGGCCTTGGTAGCAGCCCTGCGGCCGGCGCGCTCCAGGAGCCAGCAGAGAGGGGGACCCACC  
V Q L Q T Q A L V A A L R P A G S R S Q Q R G G P T

2250 2260 2270 2280 2290 2300 2310 2320  
**CfERV-Fc1 consensus** GCACCCCTCCGGGGGCTGTTCAAATGCGGGGCTGAAGGCCATTGGGCCCGTCAGTGCCCCACCCGAGGGCACCAACT  
R T P P G A C F K C G A E G H W A R Q C P T P R A P T

2330 2340 2350 2360 2370 2380 2390 2400  
**CfERV-Fc1 consensus** CGACCATGCCCTCTCTGCCATTTGATGGGCCACTGGAATCCGACTGCCTAGCCTCAGGGAATCCTCGGCGCCTCAACG  
R P C P L C H L M G H W K S D C P S L R E S S A P Q R

2410 2420 2430 2440 2450 2460 2470 2480  
**CfERV-Fc1 consensus** CGGGGGAAGACCCGAGACGGTGAAGTCCAGCCTTCCAACCTGCTCGGGCTGGAGGAaGACTGACGGAGCCAGCCTCGGGCG  
G G R P E T V S P A F Q L L G L E D D ▲ R S P A S A

2490 2500 2510 2520 2530 2540 2550 2560  
**CfERV-Fc1 consensus** CCCCTCTACCCAGGCCGAGCCAGGGTCAATGCTCCAGGTAGCGGGTAAGTCCATCTCCTTTCTGCTGGATACGGGGCT  
A P L T Q A E P R V M L Q V A G K S I S F L L D T G A

2570 2580 2590 2600 2610 2620 2630 2640  
**CfERV-Fc1 consensus** ACCTATTCTGTTCTGCCTTCTACGCGGGACCTACTCAACCCCTACCAGTCGCTGTTATGGGGATCGACGGAACTCCTC  
T Y S V L P S Y A G P T Q P S P V A V M G I D G N S S

2650 2660 2670 2680 2690 2700 2710 2720  
**CfERV-Fc1 consensus** CACTCCTAGGGCACACCTCCCTTACTTGTAGCTGGATGGGTTCCCTTCTCTCACTCATTCTCGGTGATTCCTCAT  
T P R A T P P L T C S L D G F P F S H S F L V I P S

2730 2740 2750 2760 2770 2780 2790 2800  
**CfERV-Fc1 consensus** GCCCAGTGCCCTGCTGGGTAGGATATCTCCAAAAGCTAGGGGCAACTATTCATTGTCCCTCTCCTCCCTCCTCA  
C P V P L L G R D I L Q K L G A T I H L S P S P P S S

2810 2820 2830 2840 2850 2860 2870 2880  
**CfERV-Fc1 consensus** CCCTCAGTCTGCTCATCCTATATCTCCTCACTCCATCTACTCCTACCCCGGATCAATTACCCTTGGTGAACCCCAAGT  
P S A R L I L Y L S T P S T P T P D Q L P F V N P Q V

2890 2900 2910 2920 2930 2940 2950 2960  
**CfERV-Fc1 consensus** ATGGGATACCTCGGAACCTGTAGTGGCCCTCCACACCCCTCCCGTCAAAAATAAACTCAAGGACGGTTCCAAGTTCCCTT  
W D T S E P V V A S H H P P V K I K L K D G S K F P

*gag*

NC

2x Zinc Finger

*pol*

PRO

2970 2980 2990 3000 3010 3020 3030 3040  
**CfERV-Fc1 consensus** CTAGACCCAGTTCCTATCTCCCTCCTCCATCGCCTCGGCCCTCAAACCGATCATAGAACGACTAAAGCGTCAGGGACTT  
 S R P Q F P I S L L H R L G L K P I I E R L K R Q G L

3050 3060 3070 3080 3090 3100 3110 3120  
**CfERV-Fc1 consensus** CTGATTCCCATAGCTCTCCCTGTAACCTCCCCATCTGCCGGTCCGTA AACCTCCGGAGCTTATCGATTGGTT CAGGA  
 L I P I S S P C N S P I L P V R K P S G A Y R L V Q D

3130 3140 3150 3160 3170 3180 3190 3200  
**CfERV-Fc1 consensus** CCTCGACTCATTAATGAGGCAATAGTCCCTCTCCATCCAGTGGTTCCTAACCTTATACCTGCTATCCCATATCCCTC  
 L R L I N E A I V P L H P V V P N P Y T L L S H I P

3210 3220 3230 3240 3250 3260 3270 3280  
**CfERV-Fc1 consensus** CAAGCACCCTACTTTACGGTGTGGACCTGAAGGATGCCTTTTTACTATTCCCTACACCCGATTCTACTTTCTT  
 P S T T H F T V L D L K D A F F T I P L H P D S Y F L

3290 3300 3310 3320 3330 3340 3350 3360  
**CfERV-Fc1 consensus** TTCCCTTACCTGGGAAGACCAGACACACATACCTCTGGACAATTAACCTGGACTGCTACCCAGGGGTCCGGGA  
 F A F T W E D P D T H T S G Q L T W T V L P Q G F R D

3370 3380 3390 3400 3410 3420 3430 3440  
**CfERV-Fc1 consensus** CAGCCCCATATTTTGGTCAGGCCTTGGCTGCGGATTTACAACAATGCCTCCTTAAGGCTAGTACCTTACTACAATAG  
 S P H I F G Q A L A A D L Q Q C L L K A S T L L Q Y

3450 3460 3470 3480 3490 3500 3510 3520  
**CfERV-Fc1 consensus** TAGACGACTCCTCCTGTCAGCCCTGCCCTCACCATCTCCAGGATGACACCACCTCCCTACTTAACCTCCTAGGGAGC  
 V D D L L L C S P A L T I S Q D D T T S L L N F L G S

3530 3540 3550 3560 3570 3580 3590 3600  
**CfERV-Fc1 consensus** AAAGGGTATCGGGTACACCCCTTAAGGCACAACCTGTCACCCCTTCGGTCACTTATCTGGGAATCCACCTGACCCCCAC  
 K G Y R V T P S K A Q L C T P S V T Y L G I H L T P T

3610 3620 3630 3640 3650 3660 3670 3680  
**CfERV-Fc1 consensus** CTCTAAATCTCTACCGGAGACCGTATCCGCCTCTACGAGAGCTCCAACCCCTCAGACGGCAGATGAAATACTTTCT  
 S K S L T G D R I R L L R E L Q P P Q T A D E I L S

3690 3700 3710 3720 3730 3740 3750 3760  
**CfERV-Fc1 consensus** TCCTCGGGTGGCTGGCTTCTTTAGACACTGGATTCCAACTTTTCTATTTTGGCCCGCCCTTATACCAAGCGGCAAAG  
 F L G L A G F F R H W I P N F S I L A R P L Y Q A A K

3770 3780 3790 3800 3810 3820 3830 3840  
**CfERV-Fc1 consensus** GACTCTCCAGGGTCTCTCACTGATCCCTTTCGGTCCGCGCCCTGTTTTCCAAGTTAAGAGACTGTCTCACCGCTGG  
 D T P Q G P L T D P S S V R R L F S K L R D C L T A G

3850 3860 3870 3880 3890 3900 3910 3920  
**CfERV-Fc1 consensus** GCCGATACTAATTTGCTGACCTTCAAACCATTCACCTTTTACTACTGATGAGCGGTGGGTTTCAGTACTGGCCTTT  
 P I L T L P D P S K P F H L Y T D E R S G S A T G L

3930 3940 3950 3960 3970 3980 3990 4000  
**CfERV-Fc1 consensus** TGGCCAAACCGGTTGGACTACTTACCGGATTATAGCCTATCTAAGCAGCTAGACAGCACCGCCGCGGATGGCAG  
 L A Q P V G P T Y R I I A Y L S K Q L D S T A R G W Q

4010 4020 4030 4040 4050 4060 4070 4080  
**CfERV-Fc1 consensus** CCCTGCCTTAGGGCGCTCGCAGCTGCTGCCTCCTTAACTAAGGAGGCTCTCAAATTGACTTTGGGACAACCCCTCGTGGT  
 P C L R A L A A A A S L T K E A L K L T L G Q P L V V

4090 4100 4110 4120 4130 4140 4150 4160  
**CfERV-Fc1 consensus** TTACTCCCCCATCGACTTGGGATCTTCTTAGCCACCGATCCCTGGCCACCTAACCCCTCTCGTCTCCAACCTCTCC  
 Y S P H R L G D L L S H R S L A H L T P S R L Q L F

4170 4180 4190 4200 4210 4220 4230 4240  
**CfERV-Fc1 consensus** ATCTGCTATTTCATCGAAAACCTCAAATCTCCCTCTCTACCTCTCCCGCTTAAATCCTGCAACTCTGTTGCTACACCT  
 H L L F I E N P Q I S L S T S P R L N P A T L L P T P

4250 4260 4270 4280 4290 4300 4310 4320  
**CfERV-Fc1 consensus** TCGCTACTCTGAACCCACTCACTCTGCCCGCAGCTCATAGAGGATCTCACCCCTCCACCCCTGGACTCTCTGATCA  
 S P T S E P T H S C P Q L I E D L T P P H P G L S D Q

4330 4340 4350 4360 4370 4380 4390 4400  
**CfERV-Fc1 consensus** GCCATTATCCAACCTGACCGTATACTCTTTGTAGATGGCAGCTCCTTCTGGCTGCGGATGGTGGGAGACACGCGCCT  
 P L S N P D R I L F V D G S S F L A A D G R R H A A

4410 4420 4430 4440 4450 4460 4470 4480  
**CfERV-Fc1 consensus** ATGCTGTAGTACCCAGAGACGGTAGTGGAGACAGTCCCCCTCCAATTTGGACTACTTCCCAAAGGGCTGAACTTATA  
 Y A V V T P E T V V E T V P L P I G T T S Q R A E L I

RT

RT Active Site

pol

RNase H

DEDD RNA  
hydrolysis

4490 4500 4510 4520 4530 4540 4550 4560  
 CfERV-Fc1 consensus GCTCTACCAGGCTCTACATCTATCTAAGGGACAACGAGTCACCATCTACACCGACTCAAAATATGCTATCTCATCGT  
 A L T R A L H L S K G Q R V T I Y T D S K Y A Y L I V

4570 4580 4590 4600 4610 4620 4630 4640  
 CfERV-Fc1 consensus TCATACTCATTCCGTCCTTGGCAGGAGCGGGATTTTAAACCACCAAGGGGACGCCTATAGTAAATGGACCTCTCATTG  
 H T H S V L W Q E R G F L T T K G T P I V N G P L I

4650 4660 4670 4680 4690 4700 4710 4720  
 CfERV-Fc1 consensus CCAAATTGCTTGAGGCCCTTAGTCTGCCACTGAGGTTGCAATCGTTCACTGTAGGGGCCATCAGACTTCTAAAGACATG  
 A K L L E A L S L P T E V A I V H C R G H Q T S K D M

4730 4740 4750 4760 4770 4780 4790 4800  
 CfERV-Fc1 consensus GTCTCCATAGGAAATAAAGCCGACTCAGTGGCCAGGAAACGGCCTTAAGTAACCCAATATCTCCCATCTCTTCT  
 V S I G N N K A D S V A R E T A L S N P I S P I L F L

4810 4820 4830 4840 4850 4860 4870 4880  
 CfERV-Fc1 consensus TAATACCCCTATCGACCTTTCTACTCTATAAAGGAAACTCAAGCCCTCCAGGCCCTGGGAGGAAAGCAGAAAGTAAAG  
 N T P H R P F Y S I K E T Q A L Q A L G G K A E S K

4890 4900 4910 4920 4930 4940 4950 4960  
 CfERV-Fc1 consensus GATGGATTACATCCGAGGGAAGATTGCCCTCCAGAAAACCTGGCCATACCCTAATTACTGATATCCACCAATCTCTC  
 G W I Y I R G K I A L P E N L A H T L I T D I H Q S L

4970 4980 4990 5000 5010 5020 5030 5040  
 CfERV-Fc1 consensus CATATTGGCCCAAGGGCACTGAACCACTTCTCCAGCCCTGTTTACTATCCATCCCTACCTAAGGTGATTGAGGCTGT  
 H I G P R A L N Q F L Q P L F Y Y P S L P K V I E A V

5050 5060 5070 5080 5090 5100 5110 5120  
 CfERV-Fc1 consensus CCATAGGGCTTGTAAAACCTGCTCGGCCGTAATGCACAGGGAGGAATCCGAGGCCGGGCCCTAACCATCAGTCCGAG  
 H R A C K T C S A V N A Q G G I R R P G P N H Q L R

5130 5140 5150 5160 5170 5180 5190 5200  
 CfERV-Fc1 consensus GCCATCAGCCCGTGAAGACTGGCAGCTGGACTTCACTCACATGCCCCGCCATAAAGCCTTTCGTTATCTACTGACTTTG  
 G H Q P G E D W Q L D F T H M P R H K A F R Y L L T L

5210 5220 5230 5240 5250 5260 5270 5280  
 CfERV-Fc1 consensus GTTGATACTTTTACAGGATGGATTGAGGCATACCCACAGCCAGAGACTGCAGATGTGGTGCCACAATCCTCATCGA  
 V D T F T G W I E A Y P T A R E T A D V V A T I L I E

5290 5300 5310 5320 5330 5340 5350 5360  
 CfERV-Fc1 consensus GCACATCATCCGAGGTTTGGGTTACCCCGACCCTACAGTCAGACAACGGGCCGATTTATCTCCAGTGTACCCAAC  
 H I I P R F G L P R T L Q S D N G P A F I S S V T Q

5370 5380 5390 5400 5410 5420 5430 5440  
 CfERV-Fc1 consensus AGGTGGCCGAGAGCCTCAACATTACCTGGAAGCTGCACATCCCTACCACCTCAGTCTTCGGGTAAGGTGGAAGGGCC  
 Q V A E S L N I T W K L H I P Y H P Q S S G K V E R A

5450 5460 5470 5480 5490 5500 5510 5520  
 CfERV-Fc1 consensus AACGGGCTACTTAAAGCTCAACTCACTAAACTTACCTGGAGACTCGCCTGTCGTGGCCACACTGTTACCTATAGTCT  
 N G L L K A Q L T K L T L E T R L S W P T L L P I A L

5530 5540 5550 5560 5570 5580 5590 5600  
 CfERV-Fc1 consensus CACCAGACTCCGGCGTCCCCCGAGGACCATCAGGTTGAGTCCTTTGAGTTACTGTATGGTCGGCCCTTCTTATCA  
 T R L R A S P R G P S G L S P F E L L Y G R P F L I

5610 5620 5630 5640 5650 5660 5670 5680  
 CfERV-Fc1 consensus ACCACAACCTCCGGCCATTCTCCACCTCTTTATCCTATCTGCCTTACCTTACCCTCCTCCGGCCCTCTTGAGAGCC  
 N H N L P A I P P P L L S Y L P Y L T L L R A L L R A

5690 5700 5710 5720 5730 5740 5750 5760  
 CfERV-Fc1 consensus CATGCTGATGCTGTCATTCCGGCCCCGACCAGCAATGCCTCCGAGGAAGCCTCTCCACGAGACTTATCCCCAGGGGACCA  
 H A D A V I P A P T D N A S E E A S P R D L S P G D Q  
 M L M L S F R P R P T M P P R K P L H E T Y P Q G T

5770 5780 5790 5800 5810 5820 5830 5840  
 CfERV-Fc1 consensus GGTCTTCTCAGAAATCTGCAGCCAGGCTCCCTGCAGACCGGATGGACCGGACCTCACACGGTCATCCTACCACCCCAA  
 V L L R N L Q S P G S L Q T R W T G D P H T V S I S L T P P  
 R S F S E I C S Q A P L C R P D G P D L T R S I S P P Q

5850 5860 5870 5880 5890 5900 5910 5920  
 CfERV-Fc1 consensus CCGGGCAAAATGCTGGGACATACGGCATGGGTGCACATCAACAACCTTAAACGGGACCCACAGGTATCGAATGGACC  
 T A A K L L G H T A W V H I S N N L K R A P T G I E S W T  
 P R Q N C W D I R H G C T S T T L N G H P Q V S N G P

5930 5940 5950 5960 5970 5980 5990 6000  
 CfERV-Fc1 consensus TCCAGATGGTGGGACCCACAAACTCCGCCGGCTAGGGCTCCTTCTCATACTTCTCCTGAGCCCCCGATCCAAGCGG  
 S Q M V G P T K L R L A R A P S H T S P E P P D P S G  
 P R W W D P P N S A W L G L L L I L L L S P P I Q A

RNase H

H<sub>2</sub>O<sub>2</sub> DNA Binding

pol  
IN

DDX<sub>3B</sub> protease  
resistant core

env  
SU



6010 6020 6030 6040 6050 6060 6070 6080

CfERV-Fc1 consensus TAGAATGTGATTGCATGAAAGGCAGCGGTACCTCGCGCTACTTTTCATCTTATACCCACATGCCCAGAAGCTTGTACTCA  
 R M ▲  
 V E C D C M K G S G T S R Y F S S Y T H M P R T C Y S

6090 6100 6110 6120 6130 6140 6150 6160

CfERV-Fc1 consensus GGGAAAGACCCCATCACCTGTACTTCAAGACATGCCGAAGGAACCTTTGGATGTCTGAACTTTCTCAAACCAGCCGATC  
 G K T P I T C T S R H A E G T F W M S E L S Q T S R S

6170 6180 6190 6200 6210 6220 6230 6240

CfERV-Fc1 consensus CCCTTGCAGCCGGTACCCCAAGACTGGTAAAGTATGCTGGACTTATCTAAGCCATGTGGGCCCTCTCTGATGGGGGGGAG  
 envΔ1073 start ↓  
 P C S R Y P K T G K V C W T Y L S H V G L S D G G G

6250 6260 6270 6280 6290 6300 6310 6320

CfERV-Fc1 consensus TCCAAGACCAGGCTGGCCAGGAGCAGACCCGACAGAGGGTCCACCAACTCCAGACCTCAAACCAGTTGACCTATAAG  
 V Q D Q A G Q E Q T R Q R V I H Q L Q T S N Q L T Y K

6330 6340 6350 6360 6370 6380 6390 6400

CfERV-Fc1 consensus AGTATTTCCCTTGATGACATCAAGAAAGTtCCCACCAGCAGCTAACGACAGCCCTCTAAATCCAGCTATAACTT  
 S I S L E Y I K K V P T T E Q L T T A L L N S S Y N L

6410 6420 6430 6440 6450 6460 6470 6480

CfERV-Fc1 consensus ATGGCGAAATTTCTCAAACCAGGAGCAGCAACTGTGGATCTGTTTCCCTTCTACTCTCTAATATCGTAGGAA  
 W R N F S K T G D S N C W I C F P F S T L S N I V G

6490 6500 6510 6520 6530 6540 6550 6560

CfERV-Fc1 consensus TCCCTCTCCAACATAATTGAGCGCTCCCAACTCCAGATACCAATCAGACAGTCCATATTGGACCTATTGGGGGAA  
 I P L P T N W T L P N S T I T N Q T V H I G P I G G N

6570 6580 6590 6600 6610 6620 6630 6640

CfERV-Fc1 consensus ATACCGATCATTAATTCCTCTAACTCTCTACTCCTGCAGCTGCCAACATTAATAATTCCTCTCTCCATACTGCGCCCC  
 I P I I N S S N S L T P A A A N I T N S S L P Y C A P

6650 6660 6670 6680 6690 6700 6710 6720

CfERV-Fc1 consensus CTCGGGAATATTTCTCATGCCCCAGGGCACTTACCGTTGTTAACTGCATAATGATTCCCTAGACTGCACGTTTATCC  
 S G I F L S C P Q G T Y R C L T A N D S L D C T F I

6730 6740 6750 6760 6770 6780 6790 6800

CfERV-Fc1 consensus TCCTGTCTCCCTCAACCAACATTTACTCCGATTCAGCTCCAGTCCACATTAATTTCTCCAATACCGGAGAAAAGGGCT  
 L L S P S T N I Y S D S Q L Q S T L F L Q Y R R K R A

6810 6820 6830 6840 6850 6860 6870 6880

CfERV-Fc1 consensus GCCTTTCTCCCTTTCTGATAGGAGCAGGAATAACTACTGGGGTGCCTACAGGAGTGGCGGGAATGGGAACCTCCATAGA  
 A F L P F L I G A G I T T G V A T G V A G M G T S I D

6890 6900 6910 6920 6930 6940 6950 6960

CfERV-Fc1 consensus CTTTTATTATAAATTTCCCAAGCTCTGAACGATGACATGGAACGGATCGCTGACTCCCTCACGGCCCTACAGACTCAGG  
 F Y Y K L S Q A L N D D M E R I A D S L T A L Q T Q

6970 6980 6990 7000 7010 7020 7030 7040

CfERV-Fc1 consensus TCACTAGTTTGGCAGCTGTTACCTGCAAAATCGACGGGCTCTCGACCTTTTGACCGCCGAAAAGGTGGAACCTGTCTG  
 V T S L A A V T L Q N R R A L D L L T A E K G G T C L

7050 7060 7070 7080 7090 7100 7110 7120

CfERV-Fc1 consensus TACTTAAATGAGGAATGTGCTATTTGTTAATCAATCAGGTATAGTTACTTCCAAGTTAAAGAACTCAGAGACCGAAT  
 Y L N E E C C Y F V N Q S G I V T S K V K E L R D R I

7130 7140 7150 7160 7170 7180 7190 7200

CfERV-Fc1 consensus CCAGACCAGGCGCAGGGCTCGTCTTTCTGGGCCTAGACCCACACTGGGTAACATGGcTACTCCCTTTGGcGGGAC  
 Q T R R Q G S S F W G L D P H T W V T W L L P L A G

7210 7220 7230 7240 7250 7260 7270 7280

CfERV-Fc1 consensus CCCTATGCCTAATCCTTCTCTCATCTGTGCGCCCTTGCTTGTTCGATGTTTAcAGGAACGCTGCAAGAAGCTACC  
 envΔ1073 end 7260 ↓  
 P L C L I L L L I S V A P C L F R C L Q E R L Q E L T

7290 7300 7310 7320 7330 7340 7350 7360

CfERV-Fc1 consensus CGGGTATCTGTCAACCAACTTTACTTCAACCATACTCTCGCCTGCCACATCCGACTACCCCTACAACGACGCCCCACC  
 R V S V N Q L L L H P Y S R L P T S D Y P Y N D A P P

7370 7380 7390 7400 7410 7420 7430 7440

CfERV-Fc1 consensus GTCAGCAGGAAGTAGCCAGAGCAGAGTGCACGCCCCCGACACCATATATAAAAACAAAAGGTTCGGAATGTTGGGGCCAGG  
 S A G S S Q S R V D A P D T I I ▲

7450 7460 7470 7480 7490 7500 7510 7520

CfERV-Fc1 consensus CGGGAAAGGAAAACCTCTCAAGATGGCGGATACGCCAAAATGGCTGAGGTTCTGTCAACCCTCCACTGGGATGACAGC

RDR receptor  
binding like

SU  
SU-TM

env

Furin Cleavage

ISD Cx<sub>2</sub>C

TM

SU-TM

Transmembrane

3' LTR

```
          7530      7540      7550      7560      7570      7580      7590      7600
CfERV-Fc1 consensus  TTTGAGCAGACCCTTACACCTCTCCTTTGGACTTCCTCAACCGAACCCAATGCCCTTCAAACCCAGAGGAGGAAGTCACC

          7610      7620      7630      7640      7650      7660      7670      7680
CfERV-Fc1 consensus  TTTGACTGGTCGAATTGCAATCCTTCCTTTGCATAGTGAGGGTCACTCTGACTGGTTGGATTGCAATCCTTCCTTTGCAT

          7690      7700      7710      7720      7730      7740      7750      7760
CfERV-Fc1 consensus  ATGAGCCAACCAATAGGAAACCGTTCTGCCTTACAACGTTATGTAAACCCCTACCACCTTGTCTTGGCGGACTTCCTC

          7770      7780      7790      7800      7810      7820      7830      7840
CfERV-Fc1 consensus  GACTCACTCTCTTTCCCCCGTGAGTCGTGGAACCTCGCCCGAGGGTGCCTGCAATAAAATCTGTTCTTGGACCTCGCTT

          7850      7860      7870      7880
CfERV-Fc1 consensus  GCCTTGGCGGTCTCATTTCGGTCTAGTTACTAAAAAACTTAACA
```

**3' LTR**  
(7428-7885)
